# Supplementary material for: Body mass index and waist circumference in early adulthood are associated with thoracolumbar spine shape at age 60-64: The Medical Research Council National Survey of Health and Development
Source: PubMed Central journal article supplement (PMC6002244; doi:10.1371/journal.pone.0197570), 2018-06-14
Supplement: pone.0197570.s001.pdf [file pone.0197570.s001.pdf]

# Body mass index and waist circumference in early adulthood are associated with thoracolumbar spine shape at age 60-64: the Medical Research Council National Survey of Health and Development

Anastasia V. Pavlova, Stella G. Muthuri, Rachel Cooper, Fiona R. Saunders, Jennifer S. Gregory, Rebecca J. Barr, Kathryn R. Martin, Judith E. Adams, Diana Kuh, Rebecca J. Hardy, Richard M. Aspden

## Supplementary information

**Table S1: Correlations between body composition measures at age 60-64.**

|              | <b>BMI</b> | <b>WC</b> | <b>LMI</b> | <b>FMI</b> | <b>AGFMR</b> |
|--------------|------------|-----------|------------|------------|--------------|
| <b>BMI</b>   | 1          | 0.86      | 0.83       | 0.95       | 0.56         |
| <b>WC</b>    | 0.88       | 1         | 0.72       | 0.81       | 0.66         |
| <b>LMI</b>   | 0.86       | 0.71      | 1          | 0.64       | 0.43         |
| <b>FMI</b>   | 0.90       | 0.85      | 0.57       | 1          | 0.54         |
| <b>AGFMR</b> | 0.52       | 0.54      | 0.37       | 0.53       | 1            |

Correlation coefficients are presented in white for men and in grey for women. BMI: body mass index; WC: waist circumference; LMI: lean mass index; FMI: fat mass index; AGFMR; android (abdominal): gynoid (hip) fat mass ratio.
