# Supplementary material for: Body mass index and waist circumference in early adulthood are associated with thoracolumbar spine shape at age 60-64: The Medical Research Council National Survey of Health and Development
Source: PubMed Central journal article supplement (PMC6002244; doi:10.1371/journal.pone.0197570), 2018-06-14
Supplement: pone.0197570.s002.pdf [file pone.0197570.s002.pdf]

**Body mass index and waist circumference in early adulthood are associated with thoracolumbar spine shape at age 60-64: the Medical Research Council National Survey of Health and Development**

Anastasia V. Pavlova, Stella G. Muthuri, Rachel Cooper, Fiona R. Saunders, Jennifer S. Gregory, Rebecca J. Barr, Kathryn R. Martin, Judith E. Adams, Diana Kuh, Rebecca J. Hardy, Richard M. Aspden

**Supplementary information**

**Table S2: Associations of BMI and waist circumference across adulthood with spine modes.**

| Per 1SD increase | Men                       |          | Women                    |          |
|------------------|---------------------------|----------|--------------------------|----------|
|                  | $\beta$ (95%CI)           | P value† | $\beta$ (95%CI)          | P value† |
| <b>BMI</b>       |                           |          |                          |          |
| <b>SM1</b>       |                           |          |                          |          |
| 36y              | 0.005 (-0.069, 0.078)     | .9       | -0.005 (-0.08, 0.069)    | .9       |
| 43y              | -0.026 (-0.098, 0.046)    | .5       | 0.01 (-0.063, 0.083)     | .8       |
| 53y              | -0.034 (-0.107, 0.039)    | .357     | 0.015 (-0.058, 0.087)    | .7       |
| 60-64y           | -0.001 (-0.071, 0.069)    | .973     | -0.01 (-0.082, 0.061)    | .8       |
| <b>SM2</b>       |                           |          |                          |          |
| 36y              | -0.147 (-0.222, -0.071)   | <.001    | -0.066 (-0.137, 0.005)   | .07      |
| 43y              | -0.114 (-0.188, -0.04)    | .003     | -0.081 (-0.153, -0.01)   | .025     |
| 53y              | -0.085 (-0.16, -0.01)     | .026     | -0.038 (-0.109, 0.033)   | .3       |
| 60-64y           | -0.074 (-0.148, -0.001)   | .047     | -0.035 (-0.104, 0.034)   | .3       |
| <b>SM3</b>       |                           |          |                          |          |
| 36y              | -0.168 (-0.241, -0.096)   | <.001    | -0.137 (-0.192, -0.082)‡ | <.001    |
| 43y              | -0.184 (-0.256, -0.113)   | <.001    | -0.116 (-0.171, -0.061)‡ | <.001    |
| 53y              | -0.099 (-0.171, -0.027)   | .007     | -0.107 (-0.162, -0.052)  | <.001    |
| 60-64y           | -0.119 (-0.189, -0.049)   | .001     | -0.091 (-0.145, -0.037)  | .001     |
| <b>SM4</b>       |                           |          |                          |          |
| 36y              | 0.055 (-0.019, 0.129)     | .1       | 0.101 (0.026, 0.175)     | .008     |
| 43y              | 0.019 (-0.054, 0.092)     | .6       | 0.088 (0.014, 0.162)     | .02      |
| 53y              | 0.006 (-0.066, 0.079)     | .9       | 0.069 (-0.004, 0.143)    | .07      |
| 60-64y           | -0.006 (-0.076, 0.065)    | .9       | 0.067 (-0.004, 0.139)    | .07      |
| <b>WC</b>        |                           |          |                          |          |
| <b>SM1</b>       |                           |          |                          |          |
| 36y              | 0.023 (-0.051, 0.096)     | .5       | -0.046 (-0.12, 0.029)‡   | .2       |
| 43y              | -0.036 (-0.109, 0.036)    | .3       | 0.028 (-0.044, 0.101)    | .4       |
| 53y              | -0.033 (-0.106, 0.04)     | .4       | 0.008 (-0.065, 0.08)     | .8       |
| 60-64y           | 0.006 (-0.064, 0.076)     | .9       | 0.021 (-0.051, 0.093)    | .6       |
| <b>SM2</b>       |                           |          |                          |          |
| 36y              | -0.153 (-0.229, -0.078)   | <.001    | -0.053 (-0.124, 0.019)   | .2       |
| 43y              | -0.106 (-0.18, -0.032)    | .005     | -0.006 (-0.077, 0.065)   | .9       |
| 53y              | -0.076 (-0.153, -0.00003) | .05      | 0.001 (-0.069, 0.072)    | .97      |
| 60-64y           | -0.067 (-0.14, 0.006)     | .07      | 0.022 (-0.047, 0.09)     | .5       |
| <b>SM3</b>       |                           |          |                          |          |
| 36y*             | -0.168 (-0.24, -0.096)    | <.001    | -0.051 (-0.107, 0.005)‡  | .07      |
| 43y              | -0.117 (-0.19, -0.045)‡   | .001     | -0.11 (-0.165, -0.055)   | <.001    |
| 53y              | -0.108 (-0.18, -0.036)    | .003     | -0.095 (-0.15, -0.04)    | .001     |
| 60-64y           | -0.12 (-0.19, -0.05)      | .001     | -0.1 (-0.154, -0.047)    | <.001    |
| <b>SM4</b>       |                           |          |                          |          |
| 36y              | 0.039 (-0.034, 0.113)     | .3       | 0.09 (0.016, 0.164)      | .017     |
| 43y              | 0.041 (-0.032, 0.114)     | .3       | 0.097 (0.023, 0.171)     | .01      |
| 53y              | 0.02 (-0.053, 0.092)      | .6       | 0.096 (0.023, 0.168)     | .01      |
| 60-64y           | 0.008 (-0.063, 0.078)     | .8       | 0.101 (0.029, 0.173)     | .006     |

BMI, body mass index; WC, waist circumference. Models are run on the maximum available N at each age (see table 1). †Wald's p value; \*sex-interaction p<.05. ‡ significant quadratic term but deviation from linearity was not confirmed when tests for trend across sex-specific quintiles were undertaken.
